# Supplementary material for: The Nuts and Bolts of Implementing a Modified ERAS Protocol for Minimally Invasive Colorectal Surgery: Group Practice vs. Solo Practice
Source: MDPI journal article supplement (doi:10.3390/jcm11236992), 2022-11-26
Supplement: s1 [file s1]

Supplementary Table S1. Comparison of the strategy between group practice and solo practice

|                              | Group practice                                                                                                                                                                                                                                               | Solo practice                                                               |
|------------------------------|--------------------------------------------------------------------------------------------------------------------------------------------------------------------------------------------------------------------------------------------------------------|-----------------------------------------------------------------------------|
| Members                      | 4 attending surgeons<br>Senior and junior residents<br>Nurse practitioners                                                                                                                                                                                   | One attending surgeon<br>Senior and junior residents<br>Nurse practitioners |
| Leader                       | One of the four attending surgeons                                                                                                                                                                                                                           | The same one attending surgeon.                                             |
| Ward round schedule          | Regular and start at 8:30 every day.                                                                                                                                                                                                                         | Every day but irregular time.                                               |
| Decision-making model        | One of the four attending surgeons coordinates and makes decisions based on team input. Communicate and record the consideration and objective.                                                                                                              | A single attending surgeon makes the final decision on the patient's care.  |
| Modified ERAS implementation | Rely on the modified ERAS protocol checklist.                                                                                                                                                                                                                | According to single attending surgeon's preference.                         |
| Clinical handover            | Clear recording of diagnosis, complaints, assessments, goals, and plans is needed.<br>Structured records help organize documentation to guarantee nothing is missing.<br>An electronic note keeper is essential for clinical handoff and team communication. | Less necessary.                                                             |
